# Supplementary material for: Distinct Phases of Postnatal Skeletal Muscle Growth Govern the Progressive Establishment of Muscle Stem Cell Quiescence
Source: PubMed Central journal article supplement — Stem Cell Reports. 2020 Aug 6;15(3):597–611. doi: 10.1016/j.stemcr.2020.07.011 (PMC7486220; doi:10.1016/j.stemcr.2020.07.011), 2020-08-06
Supplement: mmc1.pdf [file mmc1.pdf]

**Stem Cell Reports, Volume 15**

**Supplemental Information**

**Distinct Phases of Postnatal Skeletal Muscle Growth Govern the Progressive Establishment of Muscle Stem Cell Quiescence**

**Francesca Gattazzo, Béatrice Laurent, Frédéric Relaix, Hélène Rouard, and Nathalie Didier**

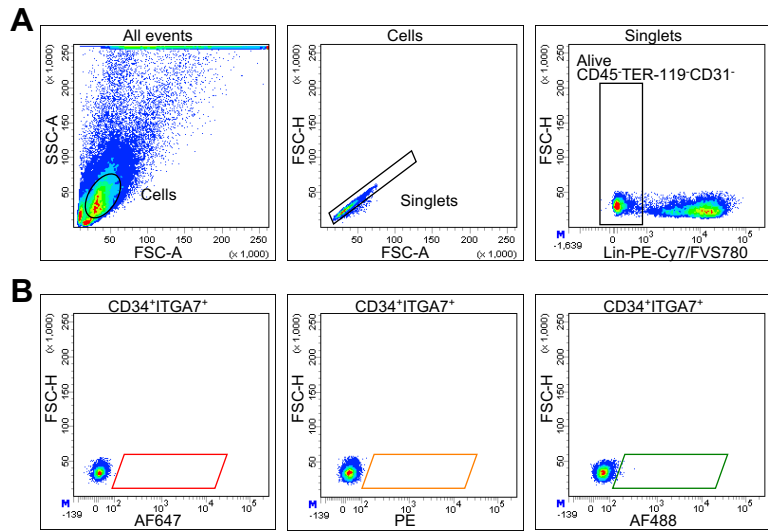

**Figure S1. Characterization and purification of CD34<sup>+</sup>ITGA7<sup>+</sup> myogenic fraction from postnatal and adult hind-limb muscles. Related to Figure 1.** Strategy for determining the proportion of PAX7<sup>+</sup>, MYOD<sup>+</sup>, MYOG<sup>+</sup> cells among the CD45<sup>+</sup>TER-119<sup>-</sup>CD31<sup>-</sup>SCA-1<sup>-</sup>CD34<sup>+</sup>ITGA7<sup>+</sup> fraction (referred to as CD34<sup>+</sup>ITGA7<sup>+</sup> fraction). Representative density scatterplots showing the gates used to analyse CD34<sup>+</sup>ITGA7<sup>+</sup> fraction from P7 mouse muscles. **(A)** Debris, doublets, Lin<sup>+</sup> cells (namely, CD45<sup>+</sup>TER-119<sup>+</sup>CD31<sup>+</sup> cells) and dead cells were excluded from the analysis. **(B)** Fluorescence Minus One controls (FMO) gates were used to determine the positivity for PAX7<sup>+</sup>, MYOD<sup>+</sup>, MYOG<sup>+</sup> cells among the CD34<sup>+</sup>ITGA7<sup>+</sup> fraction.

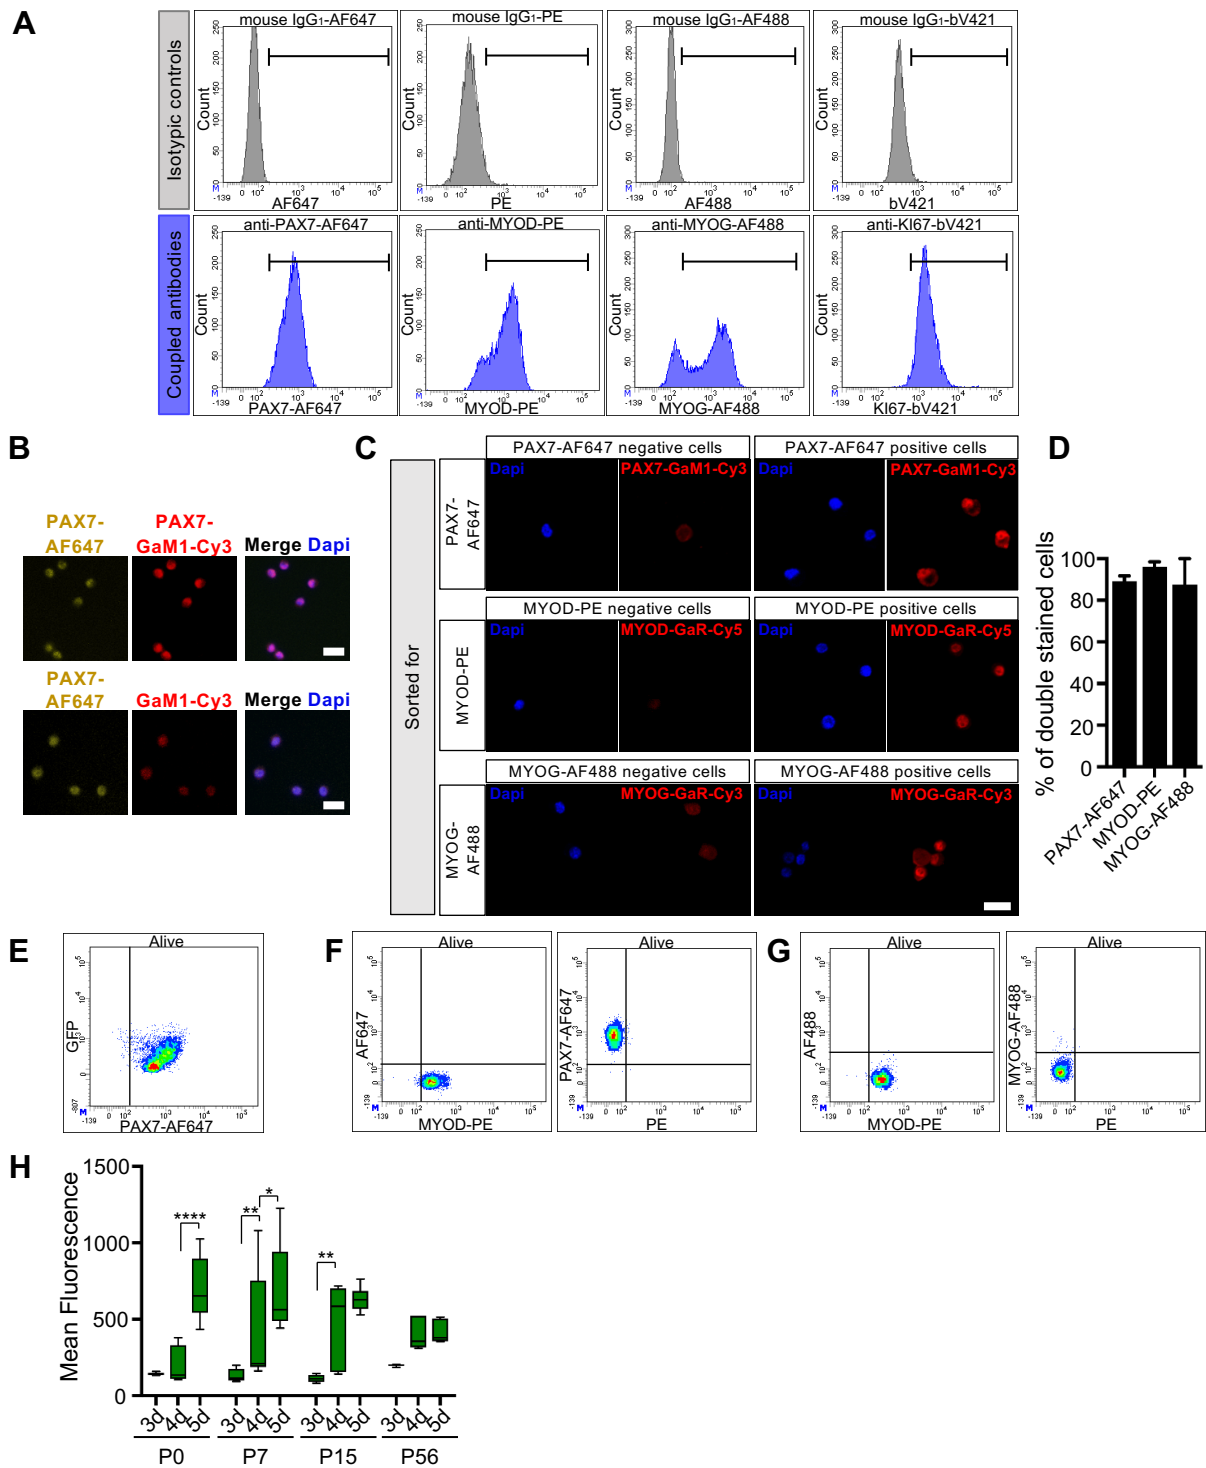

**Figure S2. Validation of the coupled antibodies used for flow cytometry analysis of cultured myogenic cells. Related to Figure 2.** (A) Cells were stained with the coupled isotypic control immunoglobulin or the coupled antibody at the same concentration. (B-D) Cells immunostained with coupled antibodies were FACS sorted and counterstained with distinct primary antibodies. See Supplemental Experimental Procedure. (B) Images showing the different intensity of the signal when cells immunostained with coupled anti-PAX7-AF647 (#sc-365843) were counterstained with primary mouse anti-PAX7 (#sc-81648) and secondary GaM1-Cy3 antibodies or with secondary GaM1-Cy3 antibody only. Only cells with a strong signal intensity were considered as double stained for PAX7. (C) Representative images of FACS sorted cells counterstained for PAX7, MYOD and MYOG. Scale bar, 25  $\mu$ m. (D) Percentage of double stained cells. Data are shown as mean  $\pm$  SEM of replicates (n=1 experiment). (E) Density scatter plot showing the correlation between endogenous PAX7 expression revealed with coupled anti-PAX7-AF647 antibody and GFP transgene expression in cultured cells derived from *Tg:Pax7-nGFP* mouse muscles. (F-G) Fluorescence Minus One (FMO) controls used to position the gates on Figure 2. (H) Mean level of expression of MYOG in mononucleated cells cultured for 3, 4 and 5 days determined by flow cytometry. Values are the mean  $\pm$  SEM of 3 independent experiments. Two-Way ANOVA analysis, with \* $p < 0.05$ , \*\* $p < 0.01$ , \*\*\* $p < 0.0001$ .

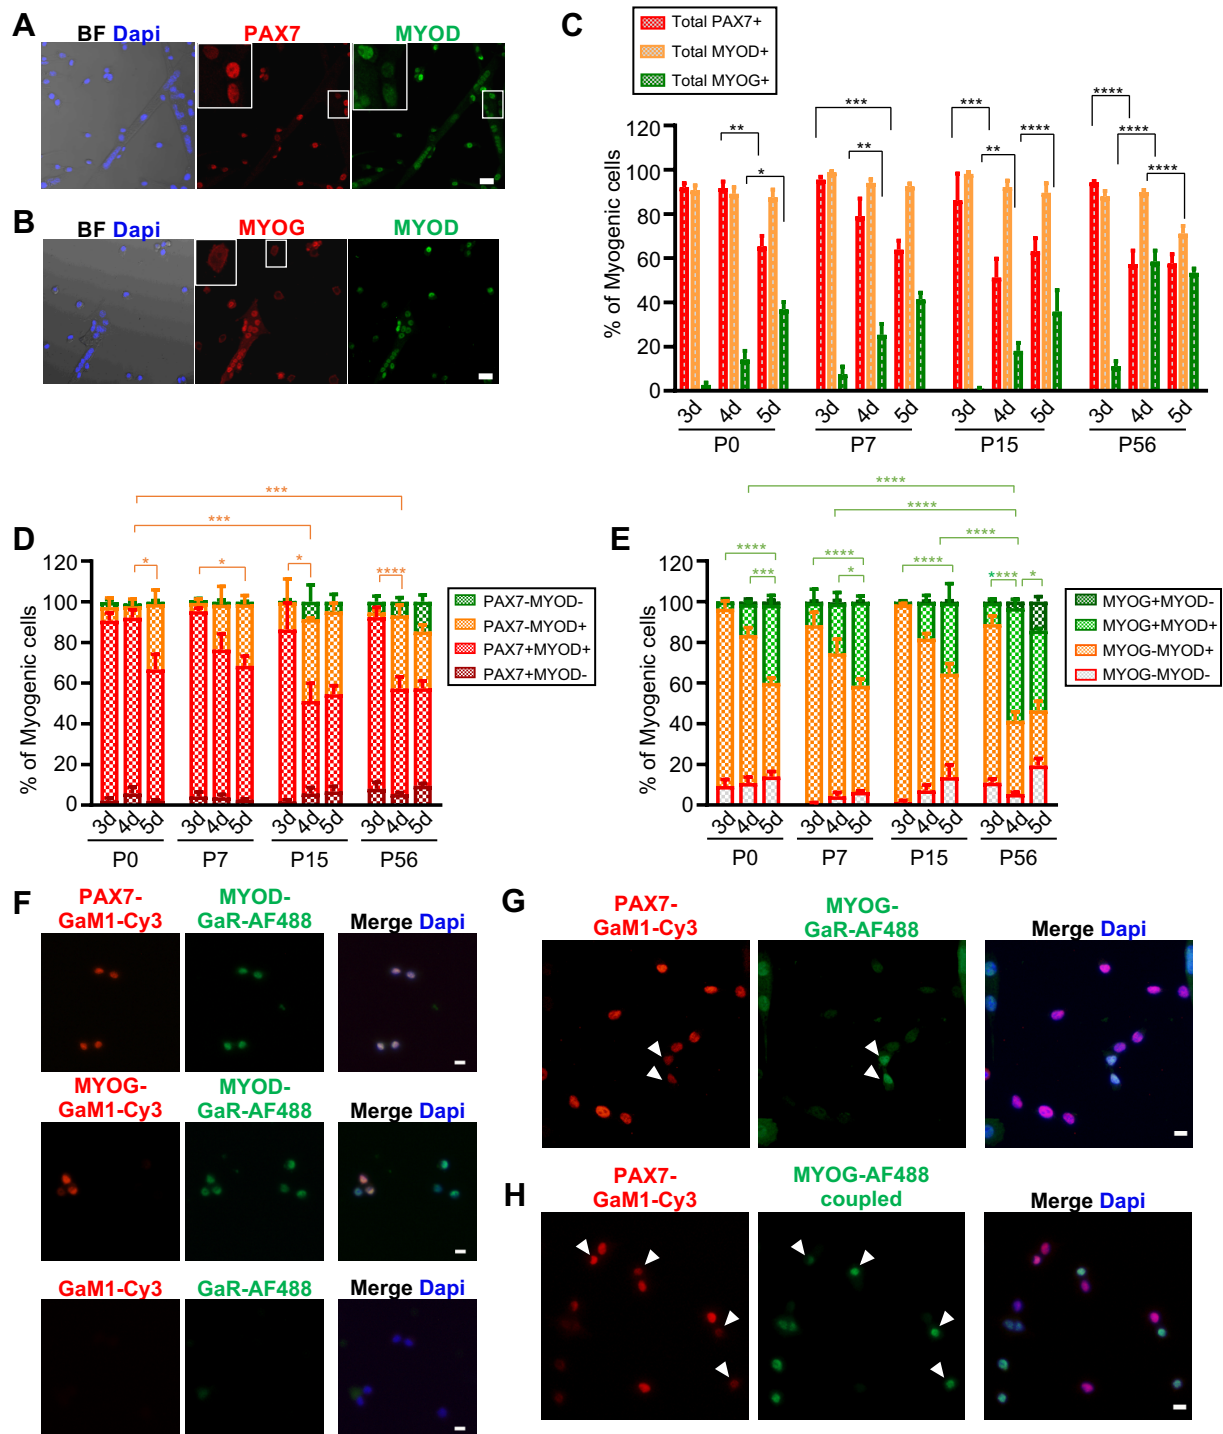

**Figure S3. Analysis of the *in vitro* behavior of myogenic cells of the CD34<sup>+</sup>ITGA7<sup>+</sup> fraction by immunofluorescence. Related to Figure 2.** (A, B) Representative images of cells stained for (A) PAX7 (red) and MYOD (green) and (B) MYOD (green) and MYOG (red). Nuclei were stained with DAPI. Magnification inlets show the variability of intensity of fluorescence signal. Scale bar, 20  $\mu$ m. Graphs showing, (C) the quantification of the proportion of total PAX7<sup>+</sup>, MYOD<sup>+</sup> and MYOG<sup>+</sup> cells on the total myogenic population, (D) the distribution of PAX7 and MYOD, (E) the distribution of MYOD and MYOG on the total myogenic population. Values are represented as the mean  $\pm$  SEM from 3 independent experiments (n=3 mice per group). Only mononucleated cells were quantified. Minimum 7 fields (20x) per well were quantified. (F) Representative images of cells immunostained for PAX7 (red) and MYOD (green) or MYOD (green) and MYOG (red) and the corresponding negative controls incubated with the secondary antibodies only. (G, H) Representative images of P56 cells cultured for 5 days in GM showing the co-expression of PAX7 and MYOG. Cells were immunostained for PAX7 (red) (#sc-81648) and MYOG (green) using (G) a rabbit anti-MYOG antibody (#sc-576), or (H) a coupled mouse anti-MYOG-AF488 antibody (#sc-52903). See Supplemental experimental procedures. Arrowheads point to double positive PAX7<sup>+</sup>MYOG<sup>+</sup> cells. Scale bar, 20  $\mu$ m.

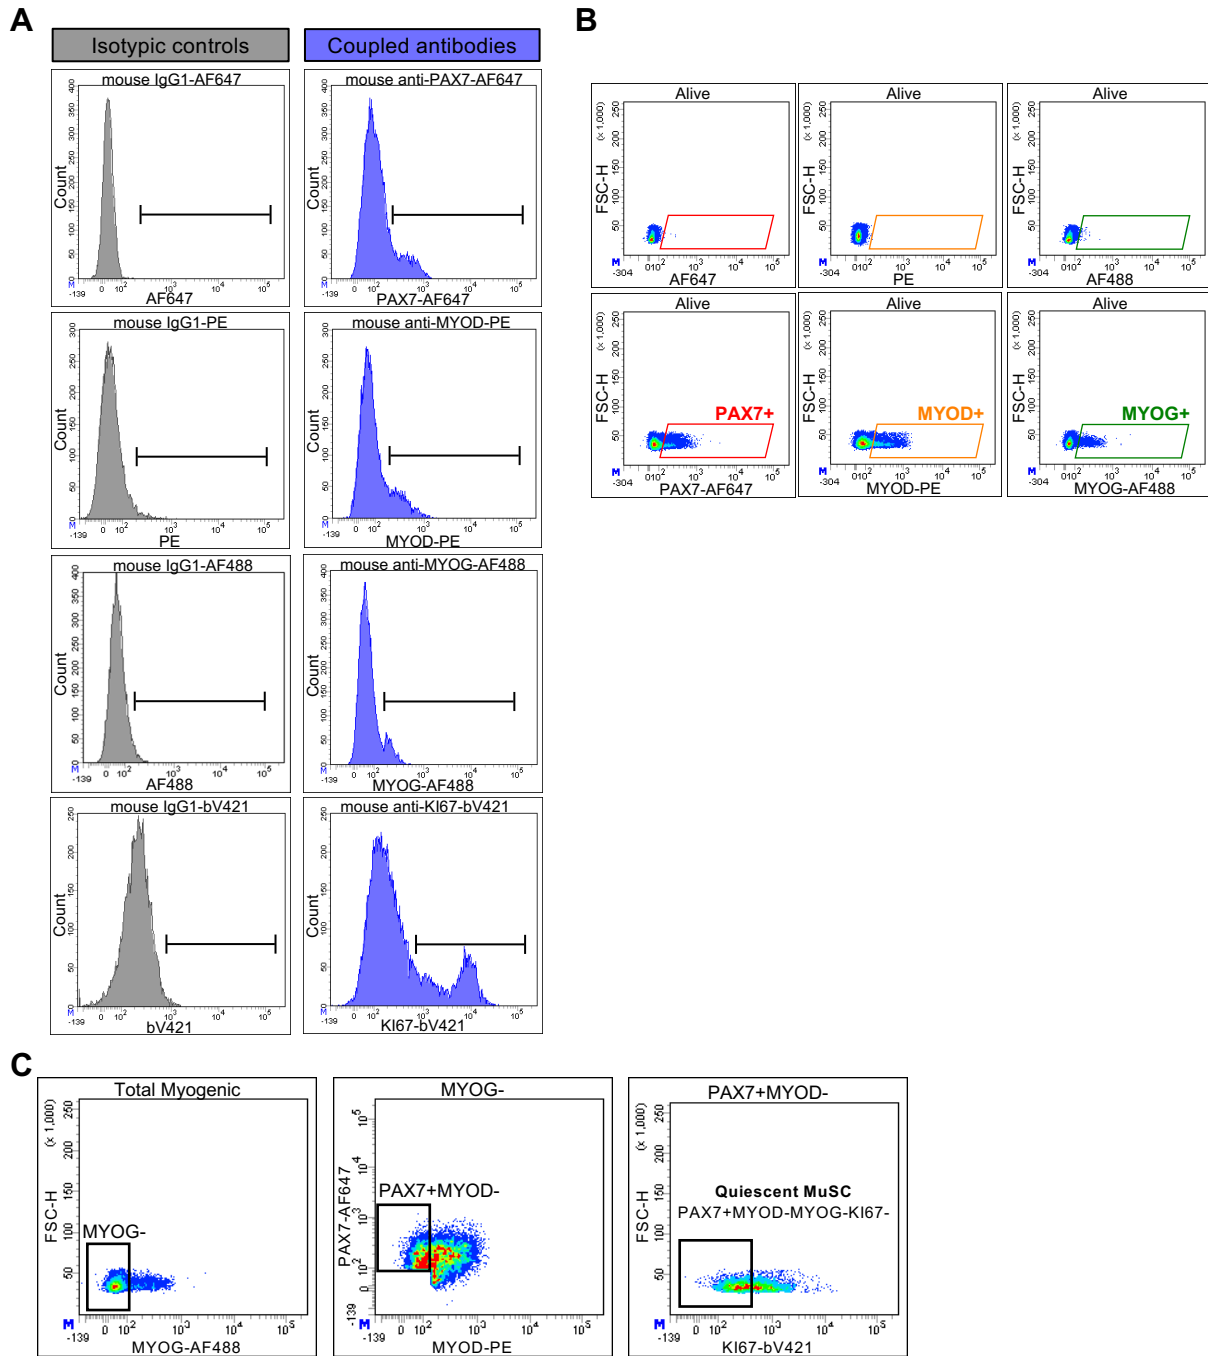

**Figure S4. Validation of the *in vivo* flow cytometry analysis. Related to Figure 3. (A)** Specificity of mouse coupled antibodies used for the *in vivo* analysis by flow cytometry. Mononucleated cells from P7 digested muscles were stained with either the coupled isotypic control immunoglobulin, either the mouse coupled antibody. **(B)** FMO controls used to position the gates for PAX7, MYOD and MYOG positivity. **(C)** Representative density scatterplots showing the gating strategy used to select quiescent MuSC defined as the PAX7+MYOD-MYOG-Ki67- fraction.

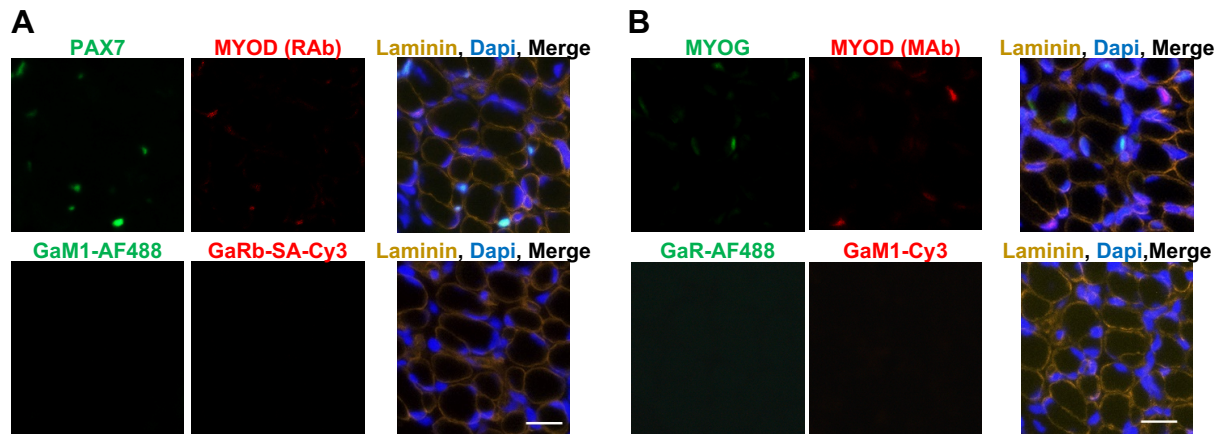

**Figure S5. Validation of the immunostaining protocol on muscle sections. Related to Figure 4.** Representative tibialis anterior (TA) muscle cross-sections of P3 mouse immunostained for (A) PAX7 (green), MYOD (red) (upper panel), or corresponding secondary antibodies only: GaM1-AF488 for Goat anti-Mouse IgG1-AF488 and GaRb-SA-Cy3 for Goat anti-Rabbit biotinylated-Streptavidin-Cy3 (bottom panel), (B) MYOG (green), MYOD (red) (upper panel), or corresponding secondary antibodies only: GaR-AF488 for Goat anti-Rabbit-AF488 and GaM1-Cy3 for Goat anti-Mouse IgG1-Cy3 (bottom panel). Laminin was immunostained (yellow) in each panel. Nuclei were stained with DAPI. Scale bar, 20  $\mu$ m.

## Supplemental Tables

**Table S1. List of antibodies used for sorting and analysis of MuSC by flow cytometry. Related to Figure 1.**

| Protein                      | Catalog    | Dilution**    | Brand          |
|------------------------------|------------|---------------|----------------|
| rat anti-mouse CD45-PECy7    | #552848    | 1 µg/300 µl   | BD Biosciences |
| rat anti-mouse TER-119-PECy7 | #557853    | 1 µg/300 µl   | BD Biosciences |
| rat anti-mouse CD31-PE-Cy7   | #561410    | 1 µg/300 µl   | BD Biosciences |
| rat anti-mouse CD34-bV421    | #562608    | 1 µg/300 µl   | BD Biosciences |
| rat anti-mouse SCA-1-FITC    | #553335    | 1 µg/300 µl   | BD Biosciences |
| rat anti-mouse SCA-1-PE      | #553108    | 1 µg/300 µl   | BD Biosciences |
| mouse anti-mouse ITGA7-AF700 | #FAB3518N  | 0.2 µg/300 µl | R&D Systems    |
| mouse anti-mouse ITGA7-FITC  | #NBP154412 | 1 µg/300 µl   | Novus          |

\*\*Amount of antibodies used for the immunostaining of mononucleated cells from digested hind-limb muscles of one adult mouse.

**Table S2. Mean fold increase number of mononucleated cells between 3 and 5 days of culture. Related to Figure 1.**

|     | Mean fold increase 5d vs 3d |
|-----|-----------------------------|
| P0  | 8.7                         |
| P7  | 3.9                         |
| P15 | 3.8                         |
| P56 | 4.0                         |

**Table S3. List of antibodies used for nuclear factors immunostaining for flow cytometry analysis. Related to Figure 2.**

| Protein                       | Catalog    | Dilution*     | Brand          |
|-------------------------------|------------|---------------|----------------|
| mouse anti-PAX3/7-AF647 (B-5) | #sc-365843 | 20 ng/100 µl  | Santa Cruz     |
| mouse anti-MYOG-AF488 (5FD)   | #sc-52903  | 20 ng/100 µl  | Santa Cruz     |
| mouse anti-MYOD-PE            | #554130    | 80 ng/100 µl  | BD Biosciences |
| mouse anti-KI67-bV421         | #562899    | 4.5 µl/100 µl | BD Biosciences |
| mouse IgG1-AF647              | #sc-24636  | 20 ng/100 µl  | Santa Cruz     |
| mouse IgG1-AF488              | #sc-3890   | 20 ng/100 µl  | Santa Cruz     |
| mouse IgG1-PE                 | #550617    | 80 ng/100µl   | BD Biosciences |
| mouse IgG1-bV421              | #562438    | 4.5 µl/100 µl | BD Biosciences |

\*Amount of antibodies used for the immunostaining of  $2 \cdot 10^5$  mononucleated cells from digested muscles.

**Table S4. List of antibodies used for IF staining. Related to Figure 2.**

| <b>Protein</b>                                      | <b>Catalog</b> | <b>Final Dilution</b> | <b>Brand</b>                 |
|-----------------------------------------------------|----------------|-----------------------|------------------------------|
| mouse IgG1 anti-PAX7                                | #sc-81648      | 1:100                 | Santa Cruz (same as DSHB Ab) |
| mouse IgG1 anti-MYOD (MAb)                          | #554130        | 1:100                 | BD Biosciences               |
| mouse IgG1 anti-MYOG 5FD                            | #sc-52903      | 1:100                 | Santa Cruz                   |
| rabbit anti-MYOD M-318 (RAb)                        | #sc-760        | 1:100                 | Santa Cruz                   |
| rabbit anti-MYOG M-225                              | #sc-576        | 1:100                 | Santa Cruz                   |
| rabbit anti-KI67 D3B5                               | #9129          | 1:150                 | Cell Signaling               |
| rabbit anti-Laminin                                 | #L9393         | 1:200                 | Sigma                        |
|                                                     |                |                       |                              |
| <b>Secondary antibodies</b>                         | <b>Catalog</b> | <b>Final Dilution</b> | <b>Brand</b>                 |
| Goat anti-Mouse IgG1-AF488 (GaM1-AF488)             | #115-545-205   | 1:800                 | Jackson Immunoresearch       |
| Goat anti-Mouse IgG1-Cy3 (GaM1-Cy3)                 | #115-165-205   | 1:800                 | Jackson Immunoresearch       |
| Goat anti-Rabbit-AF488 (GaR-AF488)                  | #111-545-144   | 1:800                 | Jackson Immunoresearch       |
| Goat anti-Rabbit-Cy3 (GaR-Cy3)                      | #111-165-144   | 1:800                 | Jackson Immunoresearch       |
| Goat anti-Rabbit-Cy5 (GaR-Cy5)                      | #A10523        | 1:800                 | Jackson Immunoresearch       |
| Goat anti-Rabbit IgG biotin (GaRb)                  | #111-065-144   | 1:1000                | Jackson Immunoresearch       |
| Streptavidin-Cy3 (SA-Cy3)                           | #016-160-084   | 1:1250                | Jackson Immunoresearch       |
| Goat anti-mouse immunoglobulin G (IgG) Fab fragment | #115-007-003   | 1:100                 | Jackson Immunoresearch       |



**Table S5. Statistical analysis of the global repartition of myogenic cells and PAX7/MYOD and MYOD/MYOG repartition on Total Myogenic cells. Related to Figures 3E, 3F and 3G.**

| Two Way ANOVA<br>Fig. 3E | Total<br>PAX7 <sup>+</sup>             | Total<br>MYOD <sup>+</sup>             | Total<br>MYOG <sup>+</sup>             |                                        |
|--------------------------|----------------------------------------|----------------------------------------|----------------------------------------|----------------------------------------|
| P0 vs P3/P4              | ns                                     | ns                                     | ns                                     |                                        |
| P0 vs P5/P6              | *,**                                   | ns                                     | ns                                     |                                        |
| P0 vs P7-P10             | **,***                                 | ns                                     | ns                                     |                                        |
| P0 vs P15                | *                                      | ns                                     | ns                                     |                                        |
| P0 vs P21, P28           | ns                                     | ns                                     | ns                                     |                                        |
| P0 vs P49                | ns                                     | ****                                   | ns                                     |                                        |
| P0 vs P56                | ***                                    | ****                                   | **                                     |                                        |
| P7/P8 vs P10/P15         | ns                                     | ns                                     | ns                                     |                                        |
| P10 vs P15               | ns                                     | ns                                     | ns                                     |                                        |
| P10 vs P21               | ns                                     | *                                      | **                                     |                                        |
| P15 vs P21               | ns                                     | ns                                     | ns                                     |                                        |
| P7 vs P49/P56            | ****                                   | ****                                   | **/****                                |                                        |
| P10 vs P49/P56           | ****                                   | ****                                   | ***/*                                  |                                        |
| P15 vs P49/P56           | ****                                   | ****                                   | ns/**                                  |                                        |
| P21 vs P49/P56           | ****                                   | ****                                   | ns                                     |                                        |
| P21 vs P28               | ns                                     | **                                     | ns                                     |                                        |
| P28 vs P49               | *                                      | ****                                   | ns                                     |                                        |
| P28 vs P56               | ****                                   | ****                                   | *                                      |                                        |
| P49 vs P56               | ns                                     | ns                                     | ns                                     |                                        |
| Fig. 3F                  | PAX7 <sup>+</sup><br>MYOD <sup>-</sup> | PAX7 <sup>+</sup><br>MYOD <sup>+</sup> | PAX7 <sup>-</sup><br>MYOD <sup>+</sup> | PAX7 <sup>-</sup><br>MYOD <sup>-</sup> |
| P0 vs P3/P4              | ns                                     | ns                                     | ns                                     | ns                                     |
| P0 vs P5/P6              | ns                                     | ****                                   | **/**                                  | ns                                     |
| P0 vs P7/P8              | ns                                     | ** <sub>1</sub> ,ns                    | ns                                     | ns                                     |
| P0 vs P10/15             | ns                                     | **** <sub>1</sub> ,*                   | *                                      | ns                                     |
| P0 vs P21                | ns                                     | ns                                     | *                                      | ns                                     |
| P0 vs P28                | ns                                     | ns                                     | ns                                     | ns                                     |
| P0 vs P49/P56            | ****                                   | ****                                   | ns,**                                  | ns                                     |
| P3/P4 vs P6              | ns                                     | *** <sub>1</sub> **                    | ns                                     | ns                                     |
| P3/P4 vs P49/P56         | ****                                   | ****                                   | ****                                   | ns                                     |
| P6 vs P49/P56            | ****                                   | ns                                     | ****                                   | ns                                     |
| P7/P8/P10 vs P15         | ns                                     | ns                                     | ns                                     | ns                                     |
| P7 vs P21                | ns                                     | ns                                     | ns                                     | *                                      |
| P7/P10 vs P49            | ****                                   | ns                                     | *** <sub>1</sub> ,****                 | *                                      |
| P7/P10 vs P56            | ****                                   | * <sub>1</sub> ,ns                     | ****                                   | ****                                   |
| P8 vs P49/P56            | ****                                   | ** <sub>1</sub> ,****                  | ****                                   | ns,*                                   |
| P10 vs P21               | ns                                     | *                                      | ns                                     | ns                                     |
| P15 vs P21               | ns                                     | ns                                     | ns                                     | ns                                     |
| P15/P21 vs P28           | **                                     | ns                                     | **                                     | ns                                     |
| P15/P21 vs P49           | ****                                   | * <sub>1</sub> ,****                   | ****                                   | ns                                     |
| P15/P21 vs P56           | ****                                   | *** <sub>1</sub> ,****                 | ****                                   | ns                                     |
| P28 vs P49               | ****                                   | ***                                    | ns                                     | ns                                     |
| P28 vs P56               | ****                                   | ****                                   | ***                                    | ns                                     |
| P49 vs P56               | *                                      | ns                                     | ns                                     | ns                                     |
| Fig. 3G                  | MYOG <sup>+</sup><br>MYOD <sup>-</sup> | MYOG <sup>+</sup><br>MYOD <sup>+</sup> | MYOG <sup>-</sup><br>MYOD <sup>+</sup> | MYOG <sup>-</sup><br>MYOD <sup>-</sup> |
| P0 vs P3-P15             | ns                                     | ns                                     | ns                                     | ns                                     |
| P0 vs P21                | ns                                     | ns                                     | *                                      | ns                                     |
| P0 vs P28                | ns                                     | ns                                     | ns                                     | ns                                     |
| P0 vs P49                | ns                                     | ns                                     | ****                                   | ****                                   |
| P0 vs P56                | ns                                     | *                                      | ****                                   | ****                                   |
| P3 vs P7                 | *                                      | ns                                     | ns                                     | ns                                     |
| P3 vs P10                | *                                      | ns                                     | **                                     | ns                                     |
| P6 vs P49/P56            | ns                                     | ns                                     | ****                                   | ****                                   |
| P7/P8/P10 vs P15         | ns                                     | ns                                     | ns                                     | ns                                     |
| P7 vs P21                | *                                      | ns                                     | ***                                    | ns                                     |

|                    |       |      |      |      |
|--------------------|-------|------|------|------|
| P8 vs P49/P56      | ns,** | ns   | **** | **** |
| P10 vs P21         | *     | ns   | **** | ns   |
| P7/P10 vs P49      | *     | ns   | **** | **** |
| P7/P10 vs P56      | ****  | ns,* | **** | **** |
| P15 vs P21         | ns    | ns   | ns   | ns   |
| P15 vs P28         | ns    | ns   | ns   | **   |
| P21 vs P28         | ns    | ns   | **** | **   |
| P15/P21 vs P49/P56 | ns    | ns   | **** | **** |
| P28 vs P49         | ns    | ns   | **** | **** |
| P49 vs P56         | ns    | ns   | ns   | *    |

**Table S6. Statistical analysis of the distribution of cycling and non-cycling myogenic populations. Related to Figure 3I.**

| Two Way ANOVA  | Quiescent MuSC | Cycling MuSC | Cycling PAX7+MYOD+ | Non-Cycling PAX7+MYOD+ | Cycling MYOD+ | Non-Cycling MYOD+ | MYOG+   |
|----------------|----------------|--------------|--------------------|------------------------|---------------|-------------------|---------|
| P0 vs P3/P4    | ns             | ns           | ns                 | ns                     | ns            | ns                | ns      |
| P0 vs P5       | ns             | ns           | **                 | ns                     | ****          | ns                | ns      |
| P0 vs P6       | ns             | ns           | ****               | ns                     | ns            | ****              | ns      |
| P0 vs P10      | ns             | ns           | **                 | ns                     | ns            | ns                | ns      |
| P0 vs P21      | ns             | **           | **                 | ns                     | ns            | ****              | ns      |
| P0 vs P28      | ****           | ns           | **                 | ns                     | ns            | ns                | ns      |
| P0 vs P49      | ****           | ns           | ****               | ns                     | ns            | ns                | **      |
| P0 vs P56      | ****           | ****         | ****               | ns                     | ns            | ns                | ****    |
| P3/P4 vs P49   | ****           | **,*         | ****               | ns                     | ns            | ns                | ns,*    |
| P3/P4 vs P56   | ****           | ****         | ****               | ns                     | *,**          | ns                | **,**** |
| P5 vs P6       | ns             | ns           | ns                 | ns                     | *             | ****              | ns      |
| P5/P6 vs P49   | ****           | *,ns         | *,ns               | ns                     | ****,ns       | ns,****           | **,ns   |
| P5 vs P56      | ****           | ****         | **                 | ns                     | ****          | ns                | ****    |
| P6 vs P7/P10   | ns             | ns           | ns                 | ns                     | ns            | ****              | ****    |
| P6 vs P15      | ns             | ns           | ns                 | ns                     | ns            | ***               | ns      |
| P6 vs P21      | ns             | **           | ns                 | *                      | ns            | ns                | ns      |
| P6 vs P56      | ****           | ****         | ns                 | ns                     | ns            | ****              | **      |
| P7 vs P8       | ns             | ns           | ns                 | ns                     | ns            | ns                | ns      |
| P7/P8 vs P15   | ns             | ns           | ns                 | ns                     | ns            | ns                | ns      |
| P7 vs P21      | ns             | ns           | ns                 | ns                     | ns            | ***               | ****    |
| P7/P8 vs P49   | ****           | ns           | ns                 | ns                     | ns            | ns,*              | ****    |
| P7/P8 vs P56   | ****           | ns           | ns                 | ns                     | **,ns         | ns,***            | ****    |
| P10 vs P15     | ns             | ns           | ns                 | ns                     | ns            | ns                | ns      |
| P10 vs P21     | ns             | ns           | ns                 | *                      | *             | ****              | ****    |
| P10 vs P49     | ****           | ns           | ns                 | ns                     | ****          | ns                | ****    |
| P10 vs P56     | ****           | *            | ns                 | ns                     | ****          | ns                | ****    |
| P15 vs P21     | ns             | ns           | ns                 | ns                     | ns            | **                | *       |
| P15/P21 vs P28 | ****/**        | ns           | ns                 | ns                     | ns            | ns,****           | ns      |
| P15 vs P49     | ****           | ns           | ns                 | ns                     | *             | ns                | ***     |
| P15 vs P56     | ****           | ns           | ns                 | ns                     | **            | **                | ****    |
| P21 vs P49     | ****           | ns           | ns                 | ***                    | ns            | ****              | ns      |
| P21 vs P56     | ****           | ns           | *                  | ****                   | ns            | ****              | **      |
| P28 vs P49     | ****           | ns           | ns                 | ns                     | ns            | ns                | ns      |
| P28 vs P56     | ****           | ns           | ns                 | ns                     | ns            | ns                | ****    |
| P49 vs P56     | ****           | ns           | ns                 | ns                     | ns            | ns                | ns      |

**Table S7. Statistical analysis of the repartition of MYOD+ and KI67+ cells among total PAX7+ cells. Related to Figure 5F.**

| Two Way ANOVA       | Quiescent MuSC | Cycling MuSC | Non-cycling PAX7+MYOD+ | Cycling PAX7+MYOD+ |
|---------------------|----------------|--------------|------------------------|--------------------|
| P0 vs P3/P4         | ns             | ns           | ns                     | ns                 |
| P0 vs P5            | ***            | ns           | ns                     | ***                |
| P0 vs P6            | ****           | ns           | ns                     | ****               |
| P0 vs P7-P15        | ****           | ns           | ns                     | ***, ****          |
| P0 vs P21           | ****           | ****         | *                      | ****               |
| P0 vs P28           | ****           | ns           | ns                     | ****               |
| P0 vs P49           | ****           | ***          | **                     | ****               |
| P0 vs P56           | ****           | ****         | ***                    | ****               |
| P3/P4/P5 vs P49/P56 | ****           | ****         | ns                     | ****               |
| P4 vs P5            | ns             | ns           | ns                     | **                 |
| P5 vs P6            | *              | ns           | ns                     | ***                |
| P6 vs P7            | ns             | ***          | ns                     | *                  |
| P6 vs P8            | ns             | ****         | ***                    | **                 |
| P6 vs P49/P56       | ****           | ****         | ns                     | ns                 |
| P7 vs P8            | ns             | ns           | ns                     | ns                 |
| P7/P8 vs P15        | ns             | ns           | ns                     | ns                 |
| P7 vs P21           | ns             | *            | ***                    | ns                 |
| P7 vs P49           | ****           | *            | ns                     | ***                |
| P7 vs P56           | ****           | ****         | *                      | ****               |
| P8 vs P49           | ****           | ns           | ****                   | ****               |
| P8 vs P56           | ****           | ****         | ****                   | ****               |
| P10 vs P15          | ns             | ns           | *                      | ns                 |
| P10 vs P21          | ns             | ****         | ****                   | ns                 |
| P10 vs P49          | ****           | ***          | ns                     | ****               |
| P10 vs P56          | ****           | ****         | ns                     | ****               |
| P15 vs P21          | ns             | ns           | ns                     | ns                 |
| P15 vs P28          | **             | ns           | ns                     | ns                 |
| P15/P21 vs P49      | ****           | ns           | ****                   | ***, ****          |
| P15 vs P56          | ****           | ****         | ****                   | ****               |
| P21 vs P28          | *              | ns           | ***                    | ns                 |
| P21 vs P56          | ****           | ns           | ****                   | ****               |
| P28 vs P49          | ****           | ns           | ns                     | ns                 |
| P28 vs P56          | ****           | **           | *                      | **                 |
| P49 vs P56          | ns             | ns           | ns                     | ns                 |

## Supplemental Experimental Procedures

**Validation of the coupled antibodies used for flow cytometry analysis. Related to Figure S2B-D.** CD45<sup>-</sup>TER-119<sup>-</sup>CD31<sup>-</sup>SCA-1<sup>-</sup>CD34<sup>+</sup>ITGA7<sup>+</sup> myogenic cells were purified from P7 mouse muscles, plated on gelatin-coated dish and expanded for 4 days in GM. After trypsinization, cells were fixed and permeabilized. Fixed cells were then divided into 3 tubes and respectively immunostained with the coupled antibodies anti-PAX7-AF647 or anti-MYOD-PE or anti-MYOG-AF488 (see **Table S3**) and FACS sorted. The positive and negative fractions were cytopun and immunostained with antibodies commonly used in the field for immunofluorescence from different species except for PAX7: namely mouse IgG1 anti-PAX7 (sc-81648), rabbit anti-MYOD M-318 (sc-760) and rabbit anti-MYOG M-225 (sc-576) (see **Table S4**). Cells were incubated overnight at 4°C with the relative primary antibody of interest. Then, cells were washed with PBS and incubated with the appropriate secondary antibodies (**Table S4**) for 1 hour at room temperature. Nuclei were stained with DAPI. Cells were mounted on microscopy slides with Fluoromount-G. Images were acquired with Zeiss LSM 800 confocal microscope at 20x magnification. For each myogenic marker, the number of double-positive cells was quantified and expressed as percentage. At least 50 cells were quantified per condition.

**Co-immunostaining of PAX7 and MYOG on myogenic cells cultured for 5 days in GM. Related to Figure S3H.** Cells were fixed, permeabilized and then incubated for one hour with BSA 5%. Cells were then incubated with primary anti-PAX7 antibody (sc-81648) for 1 hour, washed 3 times with PBS and incubated with secondary GaM1-Cy3 antibody for 1 hour. Cells were then washed 3 times with PBS, and incubated 1 hour with coupled anti-MYOG-AF488 antibody (sc-52903, Santa Cruz). Nuclei were stained with DAPI.
